# Supplementary material
Source: Springer Nature journal article supplement (https://www.springermedizin.de/resource/supplementary/12985_2014_2488_MOESM12_ESM.pdf/9606862)

CaMK4 $\beta$ /CREB

MST1

Neuronal survival

Neuronal death

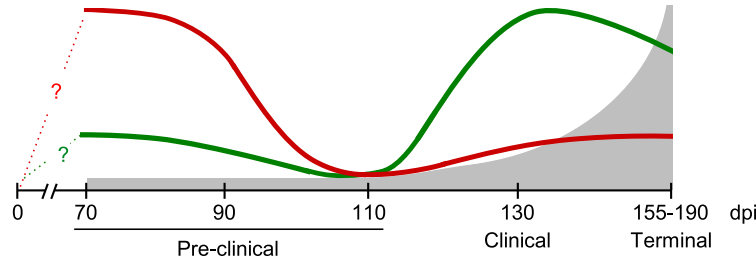

Supplement: MOESM12 [file 9606862]
